# Supplementary material
Source: publisher figshare collection journal article supplement (https://tandf.figshare.com/ndownloader/files/22800740)
Supplement: Supplementary file 1 [file 22800740]

**Supplemental Information**

**Effects of propylene glycol, vegetable glycerin, and nicotine on emissions and dynamics of electronic cigarette aerosols**

Liqiao Li, Eon S. Lee, Charlene Nguyen, and Yifang Zhu*

*Department of Environmental Health Sciences, Jonathan and Karin Fielding School of Public Health, University of California, Los Angeles, CA 90095-1772 USA*

* Corresponding author phone: +1-310-825-4324; fax: +1-310-794-2106; e-mail: [yifang@ucla.edu](mailto:yifang@ucla.edu)

**Table S1.** Summary of studies on particle size distribution of e-cigarette (e-cig) aerosols

| **Study** | **Type** | **E-cig device** | **E-liquid** | | **Flow Rate (L/min)** | **Puff duration (s)** | **Puff interval** | **PNC (#/cm3)** | **Dilution ratio or AER** | **Particle size distribution** | **Instrument** |
| --- | --- | --- | --- | --- | --- | --- | --- | --- | --- | --- | --- |
| **nicotine** | **PG/VG** |
| Ingebrethsen et al. 2012 | M | Cigalike | NA | NA | 0.825- 1.65 | 2-4 | NA | ~109 | 1:1 | CMD = 296 - 458 nm | Spectral Transmission |
| 3400-5500:1 | CMD= 14-18 nm | Electrical mobility particle sizer |
| McAuley et al. 2012 | M | Cigalike | 2.4% or 2.6 % | NA | 0.75 | 4 | 30 s | ~103 | Room size 40 m3; AER= 0.3 h-1 | Mode at 40 nm, 100 nm,  300 nm, 1 um, and 2 um | Wide range particle spectrometer |
| Zhang et al. 2013 | M | NA | NA | 100/0 | NA | NA | 30 s | ~105 | 50 ml chamber | One puff: single mode at 117 nm; steady state: bimodal at 371 nm | Scanning mobility particle sizer |
| 0/100 | One puff: single mode at 180 nm; steady state: bimodal at 414 nm |
| Schripp et al. 2013 | M | Tank-style | 0% or 1.8% | NA | NA | 3 | NA | ~105 | 10L glass chamber; AER = 3 h-1 | Bimodal at 30 and 100 nm; shifts to a single mode with increasing temperature or aging | Fast mobility particle sizer |
| S | 3 | 60 s | ~103 | 8 m3 chamber; AER = 0.3 h-1 | Bimodal at 30 and 100 nm |
| Fuoco et al. 2014 | M | Tank-style & cigalike | 0%- 1.8% | NA | 1 | 2 | 30 s | ~109 | 880:1 | Bimodal at 10 and 150 nm; single modes at 120-165 nm | Fast mobility particle sizer |
| Manigrasso et al. 2015 | M | Tank-style | 0%, 1.2%, 1.4% or 1.8% | NA | 1 | 2 | 30 s | ~109 | 880:1 | Single mode range 107-165 nm | Fast mobility particle sizer |
| Zhao et al. 2016 | M | Cigalike | 0% | NA | 1 | 3 | 30s | ~109 | 6400:1 | Single mode range 18-29 nm | Scanning mobility particle sizer |
| Mikheev et al. 2016 | M | Tank-style | 0%-2.4% | NA | 0.9 | 5 | NA | 107-108 | 30:1 | Bimodal, CMD=11-15 and 96-175 nm | Differential Mobility Spectrometer |
| 0.9 | 5 | NA | 107-108 | 3180:1 | Bimodal, CMD=16 and 75 nm |
| 0.9 | 5 | NA | 107-108 | 10600:1 | Bimodal, CMD=16 and 81 nm |
| 0.9 | 5 | NA | 107-108 | 26500:1 | Bimodal, CMD=17 and 82 nm |
| Zhao et al. 2017 | S | E-cig user & cigalike | 0% or 2.4% | NA | NA | 3 | 27 s | ~104 | Room size 80 m3; AER = 4.1 h-1 | Bimodal at 15 and 85 nm | Scanning mobility particle sizer |
| Baassiri et al. 2017 | M | Tank-style | 1.8% | 100/0, 70/30, 0/100 | 1 | 4 | 10 s | 109-1010 | 1450:1 | PG/VG=100/0: bimodal, CMD 44 nm; PG/VG=70/30: bimodal, CMD= 81 nm; PG/VG= 0/100: bimodal, CMD=81 nm | Electrical mobility particle sizer |
| Floyd et al. 2018 | M | Tank-style | 2.4% | 67/33 | 1.2 | 3 | 30 s | ~107 | 4480: 1 or 14933: 1 | Trimodal at 40, 200, and 1000 nm | Scanning mobility particle sizer and aerodynamic particle sizer |
| Mikheev et al. 2018 | M | A cigalike & two tank-style | 0.6%-0.9% | 50/50 | 0.9-2.7 | 5 | 60 s | 107-108 | 30:1 | Bimodal changed to tri-modal with higher flow rate; 1) CMD 110-117 nm using SCS puff machine; 2) CMD 225-259 nm using HPP2 puff machine | Differential Mobility Spectrometer |
| Zervas et al. 2018 | M | Tank-style | 0% or 1.2% | 50/50 | NA | 120 | NA | 106-107 | no dilution | Bimodal at ~15 and 200-400 nm | Scanning mobility particle sizer |
| Scungio et al. 2018 | M | Tank-style | 0% or 1.2% | NA | 1 | 2 | 30 s | ~108 | ~880-1000:1 | Single mode at 34 nm | Fast mobility particle sizer |
| S | E-cig user vaped | NA | NA | NA | NA | 0.7-1.5 puffs/min | ~103 | Room size 40 m3; AER = 0.2 h-1 | Bimodal at 30 and 90 nm | Fast mobility particle sizer |
| Nguyen et al. 2019 | S | Vape shop | NA | NA | NA | NA | 0.53 puff/min | 104-105 | Room size 244 m3; AER = 1.7 h-1 | Bimodal of 60 and 250 nm | Scanning mobility particle sizer |

Abbreviations: M, mainstream; S, secondhand; e-cig, electronic cigarette; AER, air exchange rate; PNC, particle number concentration; PG, propylene glycol; VG, vegetable glycerin; NA, not applicable.

**Table S2.** Properties of chemical compounds used in this study at 20 **º**C and 1 atm.

| **Chemical Properties** | **di-2-ethylhexyl sebacate (DEHS)** | **Vegetable Glycerin (VG)** | **Nicotine** | **Propylene Glycol (PG)** |
| --- | --- | --- | --- | --- |
| **Chemical Formula** | C26H50O4 | C3H8O3 | C10H14N2 | C3H8O2 |
| **CAS Number** | 122-62-3 | 56-81-5 | 54-11-5 | 57-55-6 |
| **Molecular Weight (g/mol)** | 426.67 | 92.09 | 162.23 | 76.09 |
| **Density (g/mL)** | 1.120 | 1.261 | 1.010 | 1.036 |
| **Dynamic Viscosity (Pa∙s)** | 0.021 | 1.412 | 0.004 | 0.042 |
| **Saturation Vapor Pressure (Pa)** | 1.20E-06 | 0.01 | 5.3 | 20 |
| **Henry's Law Constant (Pa∙m3/mol)** | 8.61 | 9.75E-06 | 8.20E-04 | 1.20E-03 |

**Table S3.** A summary of log-linear regression analyses on log-normalized PNC and PM2.5.

| **Log-linear Regression Data Summary** | **PNC** | | **PM2.5** | |
| --- | --- | --- | --- | --- |
| **PG/VG/Nic** | **Slope** | ***R2*** | **Slope** | ***R2*** |
| **0/100/0** | 1.92 | *0.93* | 6.76 | *0.96* |
| **10/90/0** | 1.90 | *0.95* | 6.85 | *0.96* |
| **30/70/0** | 2.09 | *0.96* | 7.08 | *0.96* |
| **50/50/0** | 2.08 | *0.97* | 6.51 | *0.96* |
| **100/0/0** | 2.20 | *0.96* | 7.16 | *0.90* |
| **0/100/2.4** | 1.89 | *0.97* | 6.54 | *0.97* |
| **10/90/2.4** | 1.86 | *0.96* | 7.02 | *0.97* |
| **30/70/2.4** | 1.85 | *0.98* | 6.91 | *0.97* |
| **50/50/2.4** | 1.84 | *0.99* | 5.98 | *0.96* |
| **100/0/2.4** | 1.64 | *0.98* | 5.40 | *0.96* |
| **DEHS** | 1.56 | *0.98* | 1.95 | *0.99* |


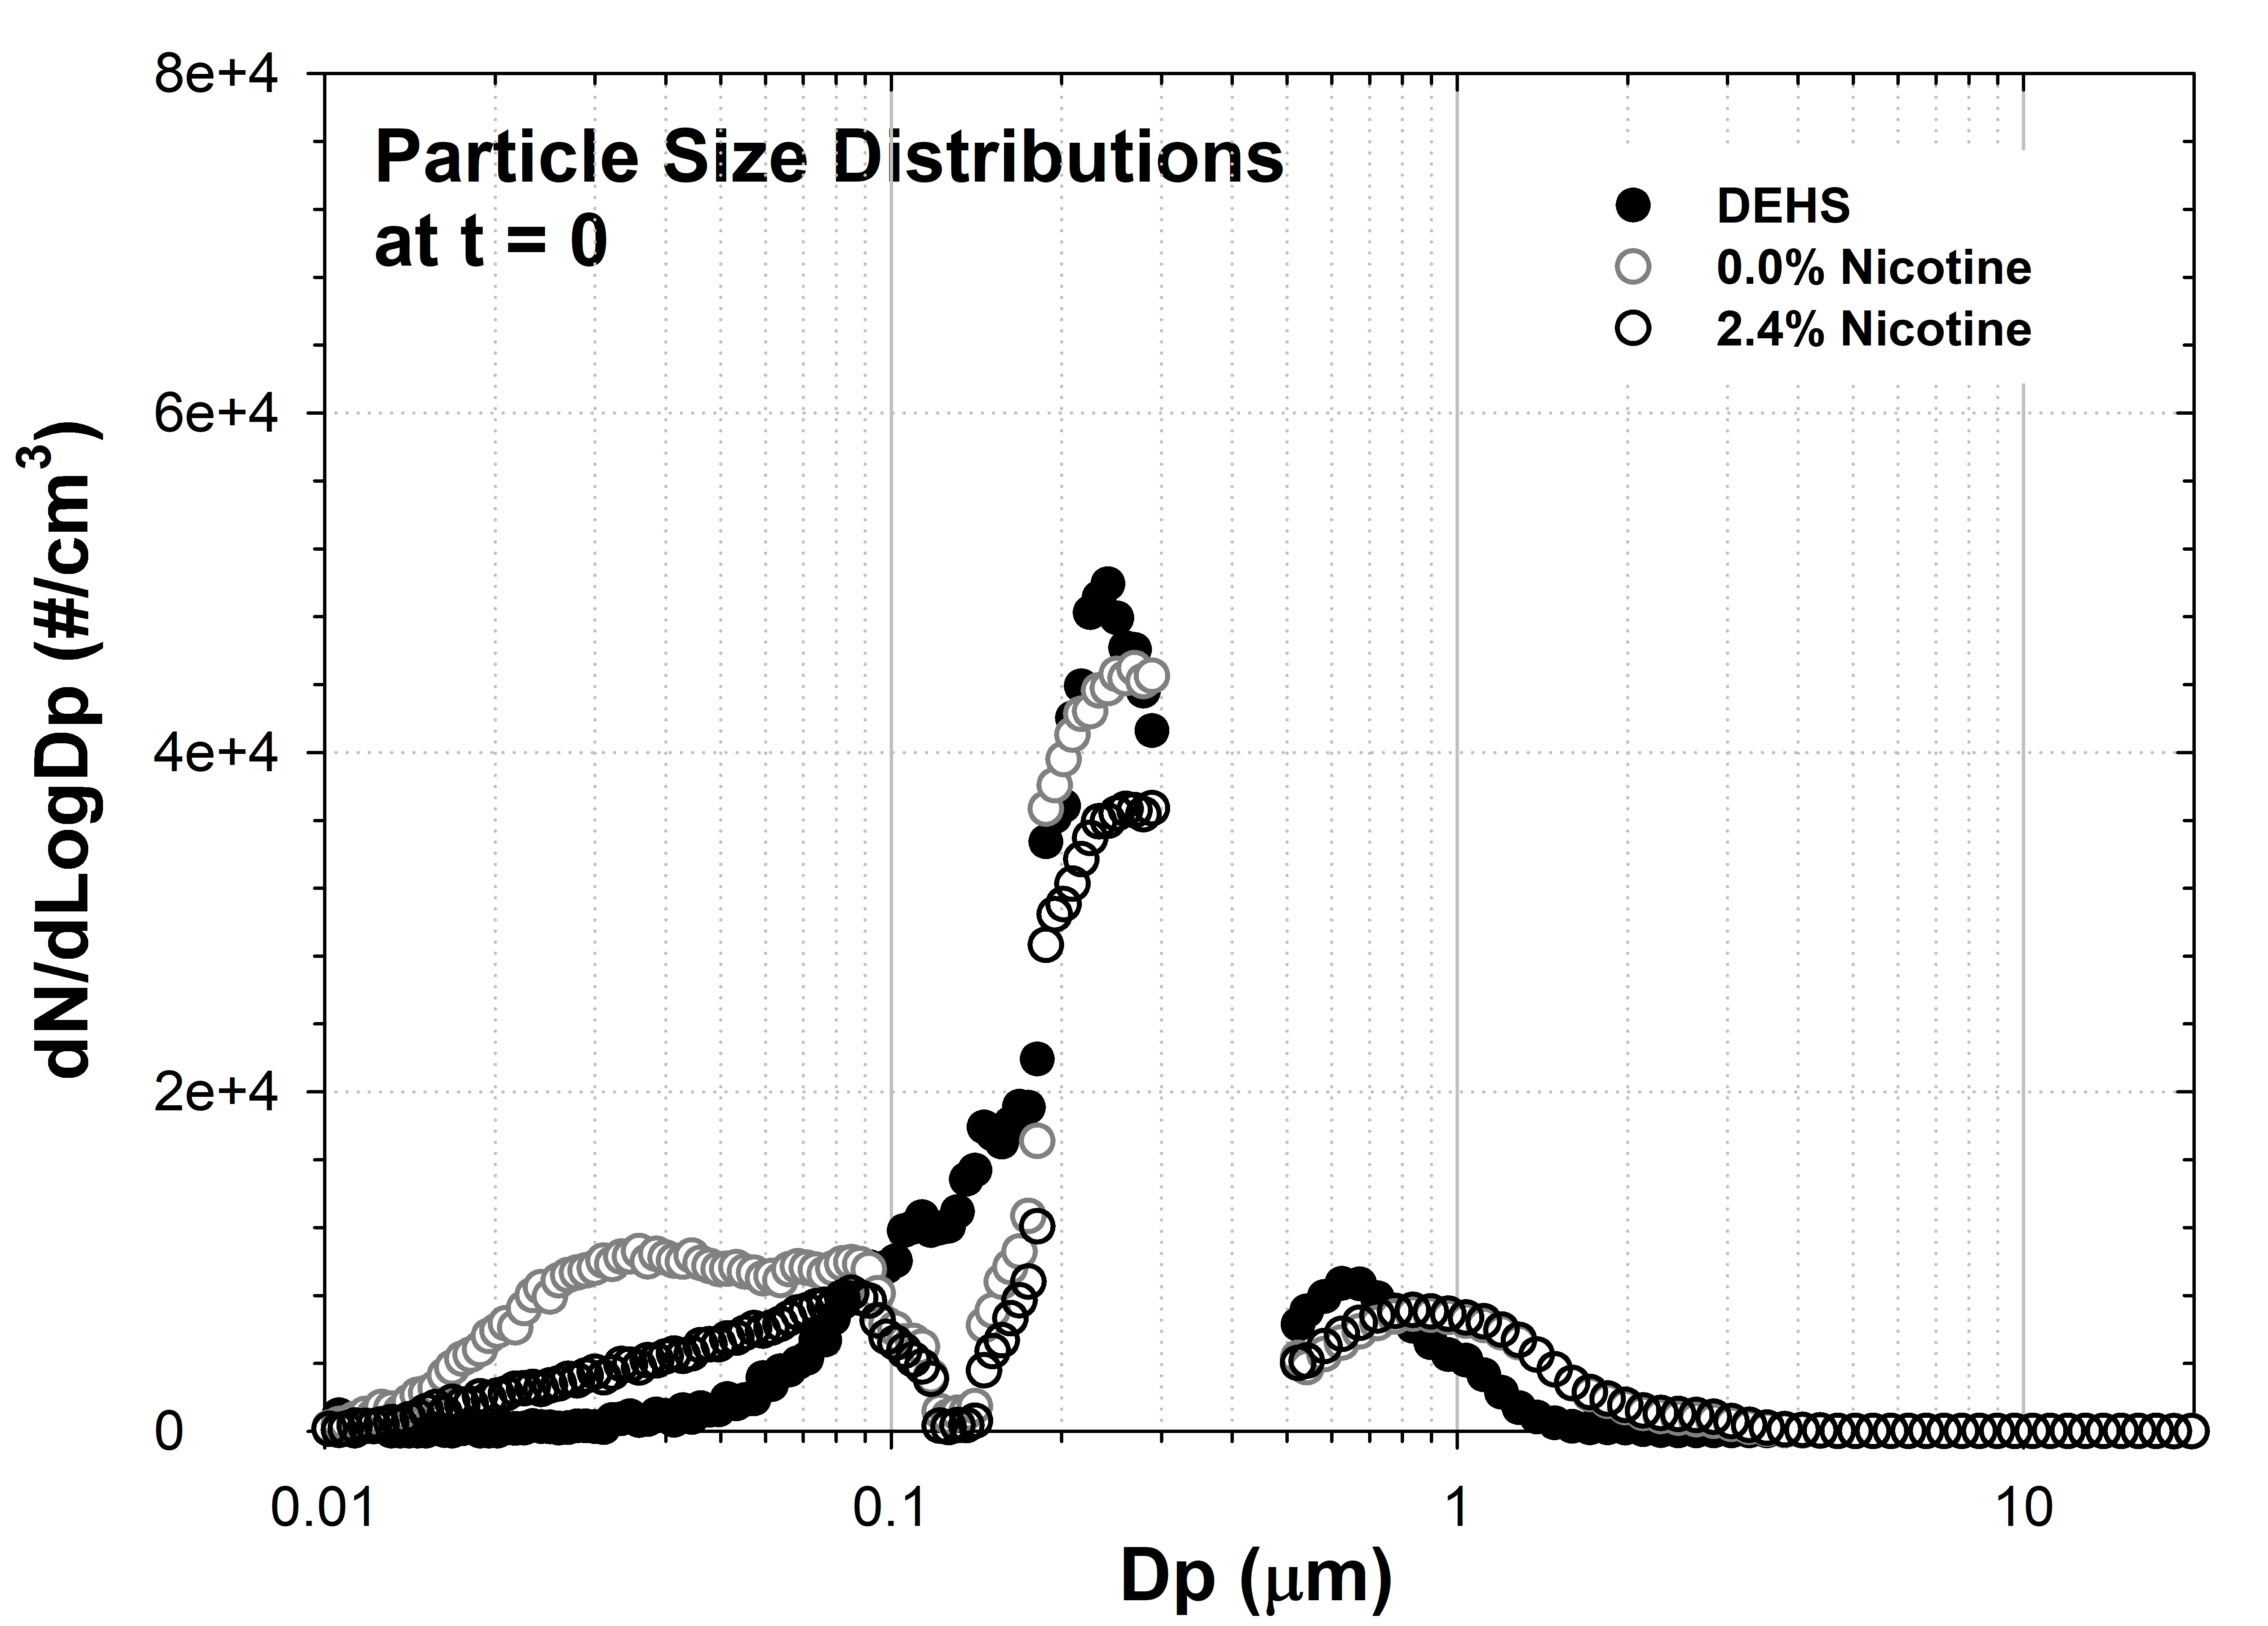


**Figure S1.** Overall particle size distributions (dN/dLogDp) of DEHS and e-cig aerosols at the start of the decay cycle (t = 0). The plotted data are the means of all measurements conducted with each type of e-liquid mixture evaluated in this study. The plotted data also compare the initial particle size distribution of e-cig aerosols with and without nicotine.


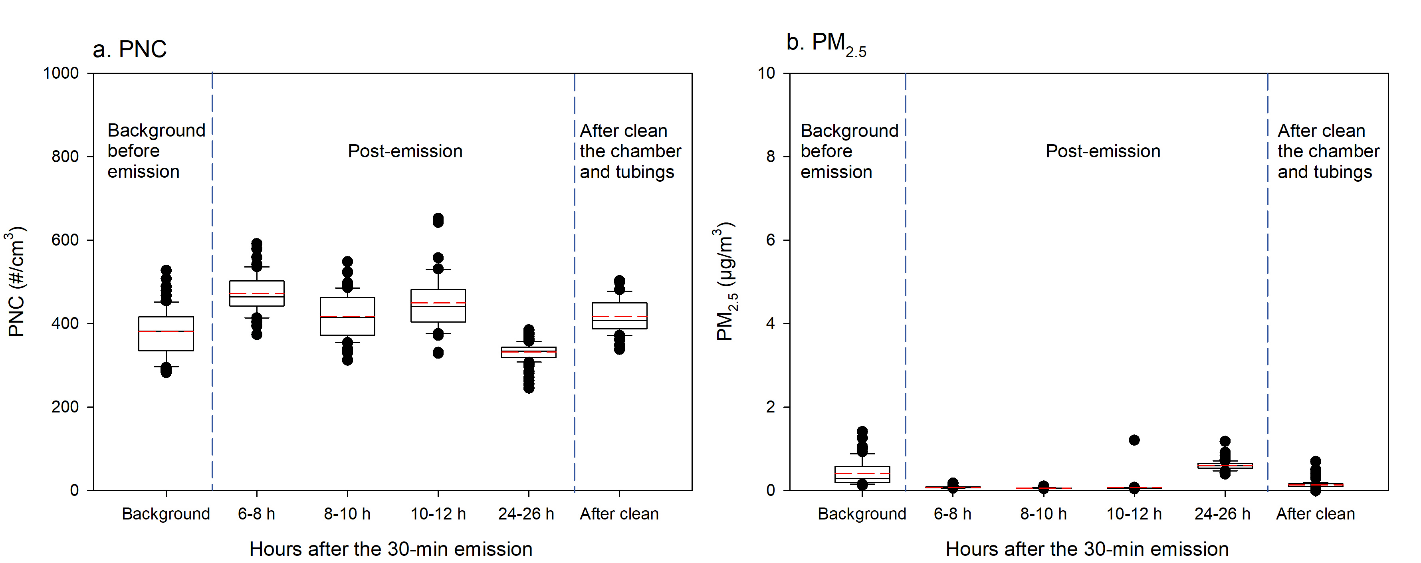


**Figure S2.** The measured PNC and PM2.5 before the 30-min e-cig emission (i.e., background), 6-26 hours after the emission, and after cleaning the chamber walls and tubings.

**Coagulation during the decay**

Based on the SMPS data, the count median diameter (CMD) and geometric standard deviation (GSD) were used to estimate the average coagulation coefficient (K̅) according to the equation (S1) ([Hinds 1999](#_ENREF_1); [Lee and Chen 1984](#_ENREF_2)):

(S1)

Where λ is mean free path, CMD is count median diameter, σg is the GSD, k is the Boltzmann’s Constant, η is the gas viscosity, T is the absolute temperature. Because the experiments were conducted under the condition of 297K and 101 kPa, we obtained λ = 0.067 µm and η= 1.82× 10-5 N.s/m2. At the initial concentrations (Ct=0) before the decay started, the e-cig aerosols from all tested e-liquid mixtures showed a similar size distribution with a similar CMD (i.e., ~ 175 nm) and GSD (i.e., ~2.35). Thus, the K̅ was determined to be ~ 1.53 × 10-9 cm3/s. Then, equation (S2) ([Hinds 1999](#_ENREF_1)) was used to calculate the PNC as a function of time by coagulation, assuming the average coagulation coefficient (K̅) to be a constant:

(S2)

Where Ct=0 is the initial concentration before decay started, Ct is the concentration at time t. The calculated t50 (i.e., time to achieve 50% Ct=0) solely due to coagulation was approximately 5-6 hours, which was 14-17 times longer than the overall t50 (i.e., ~ 20 min) for all the e-liquid mixtures summarized in Table 1. Therefore, coagulation during the decay was determined negligible compared to other particle loss mechanisms in this study. Additionally, the concentration changes due to coagulation were similar across all the e-liquid mixtures.

**Reference**

Hinds, W. C. (1999). Aerosol technology: properties, behavior, and measurement of airborne particles. John Wiley & Sons.

Lee, K. W. and Chen, H. (1984). Coagulation rate of polydisperse particles. Aerosol Science and Technology 3:327-334.
